# Supplementary material for: Capturing Free-Radical Polymerization by Synergetic Ab Initio Calculations and Topological Reactive Molecular Dynamics
Source: PubMed Central journal article supplement — Macromolecules. 2022 Feb 15;55(5):1474–86. doi: 10.1021/acs.macromol.1c01408 (PMC8909409; doi:10.1021/acs.macromol.1c01408), 2022-02-15
Supplement: ma1c01408_si_001.pdf [file ma1c01408_si_001.pdf]

# Supporting Information: Capturing free-radical polymerization by synergetic *ab-initio* calculations and topological reactive molecular dynamics

Michele Monteferrante,<sup>†</sup> Adriano Tiribocchi,<sup>†</sup> Sauro Succi,<sup>‡,†</sup> Dario Pisignano,<sup>¶,§</sup>  
and Marco Lauricella<sup>\*,†</sup>

<sup>†</sup>*Istituto per le Applicazioni del Calcolo CNR, Via dei Taurini 19, 00185 Rome, Italy*

<sup>‡</sup>*Center for Life Nano Science@La Sapienza, Istituto Italiano di Tecnologia, Viale Regina Elena, 291, 00161 Roma, Italy*

<sup>¶</sup>*Dipartimento di Fisica, Università di Pisa, Largo B. Pontecorvo 16 3, 56127 Pisa, Italy*

<sup>§</sup>*NEST, Istituto Nanoscienze-CNR, Piazza S. Silvestro 12, 56127 Pisa, Italy*

E-mail: marco.lauricella@cnr.it

Extra details on the TraPPE-UA force field; Templates used in the matching topology algorithm.

## TraPPE-UA Force Field

The TraPPE-UA<sup>1-6</sup> force fields parameters were obtained by site [http : //trappe.oit.umn.edu](http://trappe.oit.umn.edu).

In the tables are listed all force field parameters.

Table S1: Not bonded interaction parameters  $v_{NB}(r_{ij}) = 4\epsilon_{ij}[(\frac{r_{ij}}{\sigma_{ij}})^{12} - (\frac{r_{ij}}{\sigma_{ij}})^6] + \frac{q_i q_j}{4\pi\epsilon_0 r_{ij}}$ ;  $\sigma_{ij} = \frac{1}{2}(\sigma_{ii} + \sigma_{jj})$ ;  $\epsilon_{ij} = (\epsilon_{ii}\epsilon_{jj})^{1/2}$

| ID | Atom                                                           | $\epsilon/k_B(K)$ | $\sigma(\text{\AA})$ | q(e)  |
|----|----------------------------------------------------------------|-------------------|----------------------|-------|
| 1  | $[\text{CH}_2]=\text{CH}_x$                                    | 85.0              | 3.675                | 0.0   |
| 2  | $\text{CH}_x=[\text{C}](\text{sp}^2)-\text{CH}_y(\text{sp}^2)$ | 22.0              | 3.850                | 0.0   |
| 3  | $\text{CH}_x-\text{O}-[\text{C}]=\text{O}$                     | 40.0              | 3.820                | 0.4   |
| 4  | $\text{CH}_x-[\text{O}]-\text{C}=\text{O}$                     | 55.0              | 2.800                | -0.25 |
| 5  | $\text{CH}_x-[\text{CH}_2]-\text{O}-\text{CH}_y$               | 46.0              | 3.95                 | 0.25  |
| 6  | $\text{CH}_x-[\text{CH}_2]-\text{CH}_x$                        | 46.0              | 3.95                 | 0.0   |
| 7  | $\text{CH}_x-\text{O}-\text{C}=[\text{O}]$                     | 79.0              | 3.050                | -0.4  |
| 8  | $[\text{CH}_3]-\text{CH}_x$                                    | 98.0              | 3.75                 | 0.0   |

Table S2: Bonds interaction parameters:  $U_B(r_{ij}) = K(r_{ij} - r_0)^2$

| ID | Atom                                              | $r_0(\text{\AA})$ | k(kcal/mol) |
|----|---------------------------------------------------|-------------------|-------------|
| 1  | $\text{CH}_x=\text{CH}_y$                         | 1.33              | 300         |
| 2  | $\text{CH}_x(\text{sp}^2)-(\text{CH}_y=\text{O})$ | 1.52              | 300         |
| 3  | $\text{O}-(\text{C}=\text{O})$                    | 1.344             | 300         |
| 4  | $\text{CH}_x-\text{O}$                            | 1.41              | 300         |
| 5  | $\text{CH}_x-\text{CH}_y$                         | 1.54              | 300         |
| 6  | $\text{OC}=\text{O}$                              | 1.2               | 300         |

Table S3: Bending interaction parameters:  $U_{bend}(\theta) = \frac{k_\theta}{2}(\theta - \theta_0)^2$

| ID | Atom                                             | $\theta_0(\text{deg})$ | $k_\theta$ (K/rad <sup>2</sup> ) |
|----|--------------------------------------------------|------------------------|----------------------------------|
| 1  | $\text{CH}_x=(\text{C})-\text{CH}_y$             | 119.7                  | 70420                            |
| 2  | $\text{O}-(\text{C})[=\text{O}]-\text{CH}_x,$    | 110.0                  | 70600                            |
| 3  | $\text{O}=(\text{C})[-\text{OCH}_x]-\text{CH}_x$ | 125.0                  | 62500                            |
| 4  | $\text{C}[=\text{O}]-(\text{O})-\text{CH}_x$     | 115.0                  | 62500                            |
| 5  | $\text{CH}_x-(\text{CH}_y)-\text{O}$             | 112.0                  | 50300                            |
| 6  | $\text{CH}_x-(\text{CH}_2)-\text{CH}_y$          | 114.0                  | 62500                            |

Table S4: Dihedral parameters for  $U_{tor}^1(\phi) = c_0 + c_1\cos(\phi) + c_2\cos(2\phi) + c_3\cos(3\phi) + c_4\cos(4\phi)$

| ID | Atom                                                           | $c_0/k_B$ | $c_1/k_B$ | $c_2/k_B$ | $c_3/k_B$ | $c_4/k_B$ (K) |
|----|----------------------------------------------------------------|-----------|-----------|-----------|-----------|---------------|
| 1  | CH <sub>2</sub> =(C)-(C)[=O]-O                                 | 823.03    | 47.91     | -773.13   | 1.99      | 0.00          |
| 2  | CH <sub>2</sub> =(C)-(C)[-O]=O                                 | 823.03    | -47.91    | -773.13   | -1.99     | 0.00          |
| 3  | CH <sub>x</sub> -(O)-(C)(sp <sup>2</sup> )-C(sp <sup>2</sup> ) | 1820.74   | 417.41    | -1373.14  | 30.19     | 0.00          |
| 4  | CH <sub>x</sub> -(CH <sub>2</sub> )-(O)-C(sp <sup>2</sup> )    | 2029.99   | -751.83   | -538.95   | -22.10    | -51.27        |
| 6  | O-(C)(sp <sup>2</sup> )-(C)(sp <sup>2</sup> )-CH <sub>3</sub>  | 195.19    | 149.30    | 164.38    | -24.12    | 28.45         |
| 8  | CH <sub>x</sub> -(O)-(C)=O                                     | 1820.74   | -417.41   | -1373.14  | -30.19    | 0.00          |
| 9  | O=(C)-(C)(sp <sup>2</sup> )-CH <sub>3</sub>                    | 195.19    | -149.30   | 164.38    | 24.12     | 28.45         |

Table S5: Top table: dihedral parameters for  $U_{tor}^2(\phi) = c_0 + c_1(1 + \cos(\phi)) + c_2(1 - \cos(2\phi)) + c_3(1 + \cos(3\phi))$ . Bottom table: dihedral parameters for  $U_{tor}^3(\phi) = \sum_{n=1}^4 A_n \cos^{n-1}(\phi)$

| Id | Atom                                                                   | $c_0/k_B$ | $c_1/k_B$ | $c_2/k_B$ | $c_3/k_B$ (K) |
|----|------------------------------------------------------------------------|-----------|-----------|-----------|---------------|
| 5  | CH <sub>x</sub> -(CH <sub>2</sub> )-(CH <sub>2</sub> )-O               | 0.00      | 176.62    | -53.34    | 769.93        |
| 7  | CH <sub>x</sub> -(CH <sub>2</sub> )-(CH <sub>2</sub> )-CH <sub>y</sub> | 0.00      | 355.03    | -68.19    | 791.32        |
| 10 | CH <sub>x</sub> -(CH <sub>2</sub> )-(C)=O                              | 2035.58   | -736.90   | 57.84     | -293.23       |

| ID | Atom                                      | $A_1/k_B$ | $A_2/k_B$ | $A_3/k_B$ | $A_4/k_B$ (K) |
|----|-------------------------------------------|-----------|-----------|-----------|---------------|
| 11 | CH <sub>x</sub> -CH <sub>2</sub> -C(=O)-O | 373.05    | 919.04    | 268.15    | 1737.21       |

## Templates used in the matching topology algorithm

In the templates files a certain number of atoms can represent the "edges" of the reaction whose close atoms topology does not need to be updated. In particular, in each HDDMA monomer, two half monomers are available to react since each half monomer contains a reactive (-CH=CH<sub>2</sub>) vinyl group, while the edge points are represented by the most peripherals atoms with respect to the vinyl units. In the following, three templates are needed to allow the reaction to proceed. The details of the three templates are reported in Figures S1 and S2.

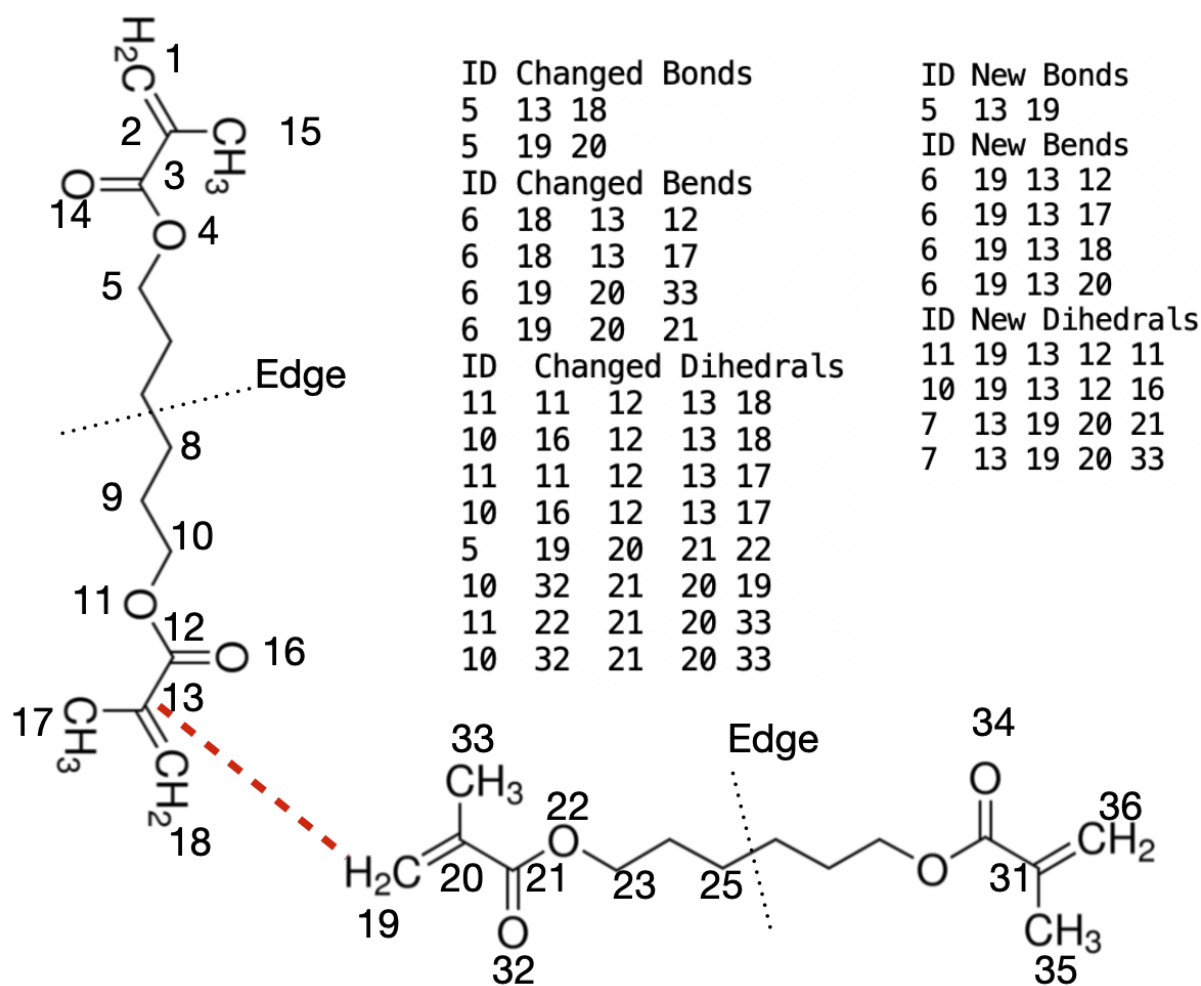

Figure S1: Edges are represented by black dotted line and between the two reacting carbons a red dotted line is present. Topology changes done in the reaction of two monomers.

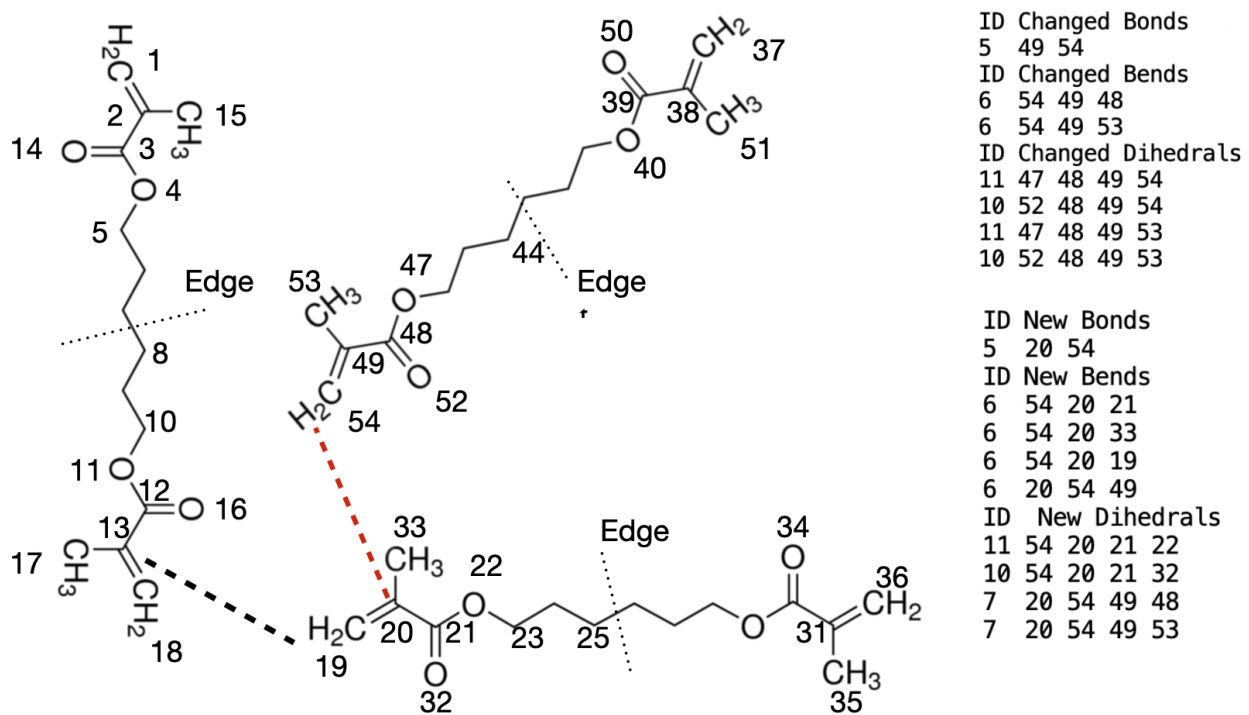

Figure S2: Edges are represented by black dotted line and between the two reacting carbons a red dotted line is present. Topology changes done in the reaction of one monomer with a just reacted monomer.

## References

- (1) Martin, M. G.; Siepmann, J. I. Transferable potentials for phase equilibria. 1. United-atom description of n-alkanes. *J. Phys. Chem. B* **1998**, *102*, 2569–2577.
- (2) Wick, C. D.; Martin, M. G.; Siepmann, J. I. Transferable potentials for phase equilibria. 4. United-atom description of linear and branched alkenes and of alkylbenzenes. *J. Phys. Chem. B* **2000**, *104*, 8008–8016.
- (3) Chen, B.; Poto, J. J.; Siepmann, J. I. Monte Carlo calculations for alcohols and their mixtures with alkanes. Transferable potentials for phase equilibria. 5. United-atom description of primary, secondary and tertiary alcohols. *J. Phys. Chem. B* **2001**, *105*, 3093–3104.
- (4) Stubbs, J. M.; Poto, J. J.; Siepmann, J. I. Transferable potentials for phase equilibria. 6. United-atom description for ethers, glycols, ketones and aldehydes. *J. Phys. Chem. B* **2004**, *108*, 17596–17605.
- (5) Kamath, G.; Robinson, J.; Poto, J. J. Application of TraPPE-UA force field for determination of vapor-liquid equilibria of carboxylate esters. *Fluid Phase Equilibria* **2006**, *240*, 46–55.
- (6) Maerzke, K. A.; Schultz, N. E.; Ross, R. B.; Siepmann, J. I. TraPPE-UA force field for acrylates and Monte Carlo simulations for their mixtures with alkanes and alcohols. *J. Phys. Chem. B* **2009**, *113*, 6415–6425.
